## Unraveling Axonal Transcriptional Landscapes: Insights from iPSC-Derived Cortical Neurons and Implications for Motor Neuron Degeneration

Jishu Xu<sup>1,2,3\*</sup>, Michaela Hörner<sup>4\*</sup>, Maike Nagel<sup>1</sup>, Milena Korneck<sup>1,3,5,6</sup>, Marvin Noß<sup>1</sup>, Stefan Hauser<sup>1,5,6</sup>, Ludger Schöls<sup>1,5,6</sup>, Jakob Admard<sup>2</sup>, Nicolas Casadei<sup>2</sup>, and Rebecca Schüle<sup>1,4†</sup>

<sup>1</sup> Center for Neurology and Hertie Institute for Clinical Brain Research, University of Tuebingen, Tuebingen, Germany

<sup>2</sup> Institute of Medical Genetics and Applied Genomics, University of Tübingen, Tübingen, Germany

<sup>3</sup> Graduate School of Cellular and Molecular Neuroscience, University of Tübingen, Tübingen, Germany

<sup>4</sup> Division of Neurodegenerative Diseases, Department of Neurology, Heidelberg University Hospital and Faculty of Medicine, Heidelberg, Germany

<sup>5</sup> German Center for Neurodegenerative Diseases (DZNE), Tübingen, Germany

<sup>6</sup> Department of Neurology, University Hospital Tübingen, Tübingen, Germany

\* These authors contributed equally to this study

† Corresponding author: [Rebecca.Schuele@uni-heidelberg.de](mailto:Rebecca.Schuele@uni-heidelberg.de)

### *Abstract*

Neuronal function and pathology are deeply influenced by the distinct molecular profiles of the axon and soma. Traditional studies have often overlooked these differences due to the technical challenges of compartment specific analysis. In this study, we employ a robust RNA-sequencing (RNA-seq) approach, using microfluidic devices, to generate high-quality axonal transcriptomes from iPSC-derived cortical neurons (CNs). We achieve high specificity of axonal fractions, ensuring sample purity without contamination. Comparative analysis revealed a unique and specific transcriptional landscape in axonal compartments, characterized by diverse transcript types, including protein-coding mRNAs, ribosomal proteins (RPs), mitochondrial-encoded RNAs, and long non-coding RNAs (lncRNAs). Previous works have reported the existence of transcription factors (TFs) in the axon. Here, we detect a subset of previously unreported TFs specific to the axon and indicative of their active participation in transcriptional regulation. To investigate transcripts and pathways essential for central motor neuron (MN) degeneration and maintenance we analyzed *KIF1C-knockout (KO)* CNs, modeling hereditary spastic paraplegia (HSP), a disorder associated with prominent length-dependent degeneration of central MN axons. We found that several key factors crucial for survival and health were absent in *KIF1C-KO* axons, highlighting a possible role of these also in other neurodegenerative diseases. Taken together, this study underscores the utility of microfluidic devices in studying compartment-specific transcriptomics in human neuronal models and reveals complex molecular dynamics of axonal biology. The impact of *KIF1C* on the axonal transcriptome

not only deepens our understanding of MN diseases but also presents a promising avenue for exploration of compartment specific disease mechanisms.

### *Abbreviations*

|       |                                             |
|-------|---------------------------------------------|
| ALS   | Amyotrophic lateral sclerosis               |
| APC   | Adenomatous-polyposis-coli-protein          |
| BDNF  | Brain derived neurotrophic factor           |
| bp    | basepairs                                   |
| BP    | Biological process                          |
| CC    | Cellular component                          |
| CMT   | Charcot-Marie-Tooth                         |
| CN    | Cortical neuron                             |
| CNS   | Central nervous system                      |
| DAI   | Day after induction                         |
| DRG   | Dorsal root ganglia                         |
| EJC   | Exon junction complex                       |
| GDNF  | Glial cell line-derived neurotrophic factor |
| GO    | Gene ontology                               |
| GWAS  | Genome-wide association studies             |
| HSP   | Hereditary spastic paraplegia               |
| HD    | Huntington disease                          |
| IPSC  | Induced pluripotent stem cell               |
| KIF1C | Kinesin family member 1 C                   |
| KO    | knockout                                    |
| MF    | Molecular function                          |
| MN    | Motor neuron                                |
| mt    | Mitochondrial                               |
| NGF   | Nerve growth factor                         |
| QC    | Quality control                             |
| PC    | Principal component                         |
| PCA   | Principal component analysis                |
| RP    | Ribosomal protein                           |

|         |                                       |
|---------|---------------------------------------|
| SMA     | Spinal muscular atrophy               |
| SPG58   | Hereditary spastic paraplegia type 58 |
| STMN    | Stathmin                              |
| TF      | Transcription Factor                  |
| TPM     | Transcripts per million               |
| RNA-seq | RNA-sequencing                        |
| WT      | Wild-type                             |

## Introduction

The inaccessibility of the brain makes analysis of homeostatic and disease conditions challenging. However, understanding of these conditions and their pathological mechanisms is a prerequisite for developing targeted therapies for diseases of the central nervous system (CNS). Even though considerable research goes into the development of novel therapeutic approaches for common and rare neurodegenerative diseases, many are still without cure. Up to this day, mostly post-mortem derived brain tissue is analyzed, where preservation of RNA, protein, DNA, and lipids is challenging. Therefore, incomplete understanding of pathomechanisms contributes to missing therapeutic solutions. Neurons are highly polarized and display high morphological complexity. Potent and functional communication between their soma and distal processes (axons) is necessary for correct functions (Bentley & Banker, 2016). Consequently, correct localization of mRNA and subsequent local protein synthesis are needed (Sutton & Schuman, 2006; Wang *et al.*, 2010; Perry & Fainzilber, 2014; Tom Dieck *et al.*, 2014). Interestingly, in neurodegenerative conditions like amyotrophic lateral sclerosis (ALS), Alzheimer's disease (AD), Huntington disease (HD), glaucoma, and hereditary spastic paraplegia (HSP), axonal degeneration often precedes and sometimes is causative of neuronal death (Li *et al.*, 2001; Ferri *et al.*, 2003; Fischer *et al.*, 2004; Libby *et al.*, 2005; Stokin *et al.*, 2005; Hörner *et al.*, 2022). Additionally, recent studies provide evidence that mRNAs are present in large quantities in the axon, implicating local translation as an important factor in axonal health and survival (Zivraj *et al.*, 2010; Gummy *et al.*, 2011; Nijssen *et al.*, 2018). This in turn indicates that our understanding of local translation and its function needs revision and highlights the necessity for new methods decrypting the axonal transcriptome. Recent advances in stem cell research enable reprogramming of somatic cells into pluripotent stem cells (iPSCs) and their differentiation into different neuronal subtypes. This poses the chance to better understand homeostatic and disease conditions of the brain. Along this line, transcriptome profiling has been used as a valuable tool to investigate changes in the cell body and axonal protrusion of neurons derived from primary embryonic mouse motor neurons and primary embryonic mouse dorsal root ganglia (DRG) (Minis *et al.*, 2014; Briese *et al.*, 2016). However, these datasets contained high numbers of proliferative and glial marker sets, suggesting contamination by other cellular components or non-neuronal cells (Minis *et al.*, 2014; Briese *et al.*, 2016). More recently, Nijssen *et al.* developed an approach using a microfluidic device to clearly separate the axon from the cell body with sensitivity similar to single-cell sequencing (Nijssen *et al.*, 2018), making it possible to closely examine the axonal transcriptome in healthy and diseased conditions.

To investigate transcripts and pathways critical for axonal maintenance and degeneration, we investigated kinesin family member 1 C (*KIF1C*) dependent changes to the axonal transcriptome. Mutations in *KIF1C*, a motor protein that is causative of an autosomal recessive form of HSP (SPG58, #611302), lead to axonal degeneration of central motor neurons (MN). *KIF1C* is implicated in many functions, including

maintenance of Golgi morphology, cell migration, formation of podosomes in vascular smooth muscle cells and macrophages, and MHC presentation on the cell (Kopp *et al.*, 2006; del Rio *et al.*, 2012; Simpson *et al.*, 2012; Theisen *et al.*, 2012; Bhuwania *et al.*, 2014; Efimova *et al.*, 2014; Lee *et al.*, 2015). Interestingly, *KIF1C* has also been implicated in long range directional transport of APC-dependent mRNAs and RNA-dependent transport of the exon junction complex (EJC) into neurites, suggesting *KIF1C* can bind RNA in a direct or indirect manner (Pichon *et al.*, 2021; Nagel *et al.*, 2022; Norris & Mendell, 2023). However, which impact loss of *KIF1C* has on the axonal transcriptome remains elusive.

Using microfluidic chambers, we here provide evidence that RNA-sequencing (RNA-seq) of axons of iPSC-derived cortical neurons (CNs) delivers high-quality, pure, and reliable axonal transcriptome profiles. In agreement with previous studies the axonal compartment contained only a subpopulation of genes compared to the soma and markers for glial and proliferative cells were absent. Importantly, we find that axons not only present with a distinct transcriptome that is clearly separated from the soma but also detect the presence of a set of transcription factors (TF), previously unknown to be present in the axon.

We show that loss of *KIF1C* leads to widespread changes in this composition and unravel transcriptomic changes that may be relevant for other neurodegenerative diseases. Therefore, this study increases our understanding of homeostatic and disease-related transcriptome conditions in the soma and axons of iPSC-derived CNs.

## Results

### *Microfluidic devices enable RNA-sequencing of iPSC-derived human CN axons*

To investigate changes in the axonal in relation to the soma transcriptome in a human neuronal model we performed RNA-seq on axonal and soma samples of iPSC-derived CNs. Briefly, CNs were plated into microfluidic devices and the axons were recruited to the empty chamber by using a gradient of glial cell line-derived neurotrophic factor (GDNF), brain-derived neurotrophic factor (BDNF), and nerve growth factor (NGF) (Supplementary Figure 1A, B). Subsequently, each compartment was individually lysed and subjected to RNA-seq (Supplementary Figure 1A; see Methods).

Our RNA-seq pipeline encompassed read quality control (QC), RNA-seq mapping, and gene quantification (see Methods). On average, each sample yielded 34.32 million pair end reads, with a mean read length of 109 basepairs (bp). Quality assessments via MultiQC indicated that over 92% of these reads had a Phred score above 30 (Q30), pointing to high sequencing fidelity. We aligned these fastq reads to reference the genome using STAR, achieving an average mapping rate of 89.1%. Following alignment, gene expression was measured in transcripts per million (TPM) values via featureCounts.

In total, 20,199 genes were detectable across all datasets, with a TPM > 1 in at least three RNA samples. Among the whole dataset, the soma samples exhibited an average of  $16,159 \pm 880$  detectable genes, whereas the axon samples demonstrated a significantly lower count, with an average of  $5,139 \pm 1,642$  genes (Figure 1A). An initial principal component analysis (PCA) highlighted sequencing batch effects, which were corrected using the ComBat method from the preprocessCore package. Three axon RNA-seq samples (two wild-type (WT) and one *KIF1C*-knockout (KO) sample) were removed due to their poor correlation ( $r < 0.5$ ) with other samples. The remaining samples passing the final QC, resulted in 13 soma (WT: 6; *KIF1C-KO*: 7) and 10 axonal samples (WT: 5; *KIF1C-KO*: 5) (Supplementary Figure S2; Supplementary Table S1).

The final PCA after batch correction and sample QC illustrated distinct clustering (Figure 1B). Principal component (PC) 1 prominently differentiated the transcriptome of the axon from soma samples, emphasizing their considerable transcriptional disparities. Concurrently, PC2 separated samples by genetic background—WT versus *KIF1C-KO* (Figure 1B).

To confirm our samples' cellular composition and purity, we referred to a list of recognized glial, neuronal, and proliferative marker genes (Supplementary Table S2) and visualized their expression in a heatmap (Figure 1C). The analysis revealed that our RNA-seq samples, which passed QC, exhibited strong expression of neuronal markers while showing a marked absence of glial or proliferative marker expression (Figure 1C). Comparison of our data to a recently published dataset, focusing on human stem cell-derived spinal motor axons (Nijssen *et al.*, 2018), revealed a congruent expression pattern (Figure 1C).

In summary we demonstrate that our experimental paradigm, that uses microfluidic devices to separate neuronal axons from soma, enables RNA-seq of axonal fractions with a high specificity. Intensive QC revealed high purity of both compartments without contamination by either glial components or cell somas in the axonal compartment.

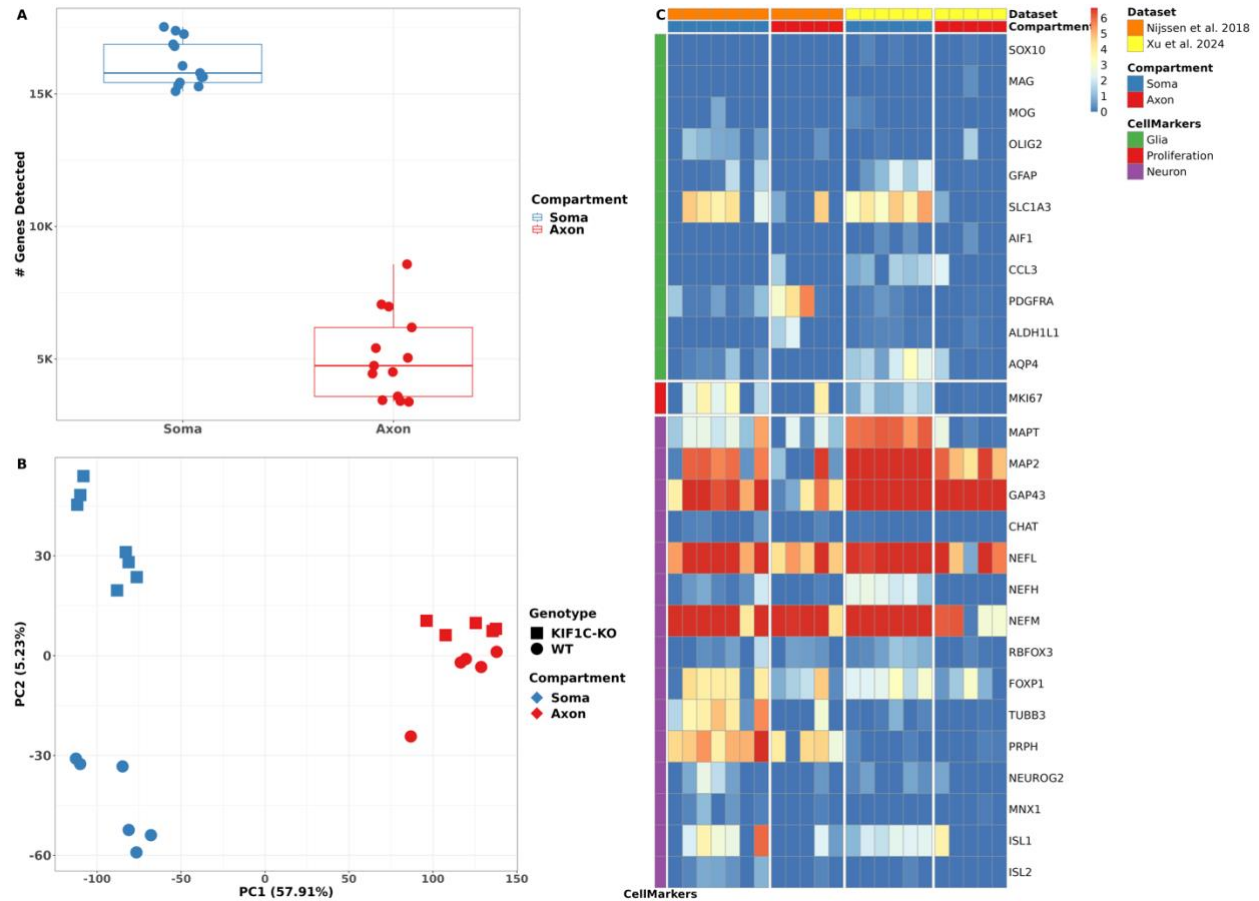

**Figure 1: Quality control reveals RNA-seq for axonal compartments is highly specific.** **A.** Median number of gene counts detected in the soma (blue) and axonal compartment (red) (TPM>1 in at least 3 samples; across all samples). Notably, the number of detected genes in the soma compartment ( $16,159 \pm 880$ ) is approximately three folds higher than in the axon compartment ( $5,139 \pm 1,642$ ). Data is presented as medium and interquartile range. **B.** Post QC PCA scatter plot. PC1 clearly distinguishes the soma (blue) and axonal (red) compartment. PC2 distinguishes WT (circle) and *KIF1C-KO* (square) samples. **C.** Expression log<sub>2</sub>(TPM) values of glial (green, top row), proliferative (lavender, middle row) and neuronal marker genes (purple, bottom row) in soma (blue, left columns) and axonal compartments (red, right columns), in Nijssen *et al.*, 2018 (orange, left) and our dataset (Xu *et al.*, 2024; yellow, right). As in the samples from Nijssen *et al.*, our samples show low expression of glial and proliferative marker genes while neural marker genes are highly expressed.

### *Axonal compartments of iPSC-derived CNs show a unique transcriptional RNA profile*

Next, we aimed to delineate the transcriptomic differences between soma and axonal compartments. For this, we analyzed 5 WT axon and 6 WT soma samples. On average, we detected  $16,207 \pm 981$  expressed genes (TPM>1) in WT soma samples and  $5,075 \pm 2080$  genes (TPM>1) in axon samples. Of note, we detected a higher number of genes in both compartments compared with a recently published dataset (Supplementary Figure S3) (Nijssen *et al.*, 2018).

Interestingly, the analysis of the top 100 expressed genes within each compartment demonstrated that 57 genes exhibited compartment-specific expression and the profile of highly expressed genes varied between compartments: in the soma we predominantly detected protein-coding mRNAs, with diverse functional implications, whereas axonal expression was characterized by a broader spectrum of gene classes, including a notable prevalence of RNAs encoding ribosomal proteins (RP genes) and mitochondrially encoded RNAs (mt-RNA) (Supplementary Figure S4A, C). Of note, 43 of the top overall 100 genes were concurrently expressed in both axon and soma, demonstrating a significant convergence (Supplementary Figure S4B). Among these, two genes encoding microtubule-associated proteins, Stathmin (*STMN1*) and *STMN2*, were identified. These proteins are pivotal in axonal development and repair (Rubin & Atweh, 2004; Thornburg-Suresh *et al.*, 2023; Lopez-Erauskin *et al.*, 2024). Furthermore, we detected *GAP43*, which plays a significant role in axonal growth, particularly during development and regeneration (Denny, 2006; Chung *et al.*, 2020).

Genes with expression levels of TPM>1 in a minimum of 3 samples in axon and soma were considered for studying transcriptomic differences. Differential expression analysis identified 14,056 genes differentially expressed (FDR adjusted  $p$ -value<0.05) between the compartments: 13,745 genes were enriched in the soma compared to the axon and 311 were enriched in the axon compared to the soma (Supplementary Figure S5). PCA, considering all expressed genes in WT compartments, distinctly separated the axon from the soma, with PC1 accounting for 68.3% of the variance (Figure 2A), underscoring the distinct transcriptomic profile of the axonal compartment. Interestingly, the most significantly enriched genes in the axon, displaying a  $\log_{2}FC > 2$  and an adjusted  $p$ -value<0.05, were involved in ribosomal subunits (*e.g.*, *RPL12*, *RPL39*, *RPL31*), respiratory chain complex (*e.g.*, *MT-ND1*, *MT-CO1*), ion transport (*e.g.*, *BEST1*), and mRNA splicing (*e.g.*, *YBX1*) (Figure 2B). Consequently, GO-term analysis of axon-enriched genes primarily spotlighted ribosome process functions and mitochondrial processes (Figure 2C).



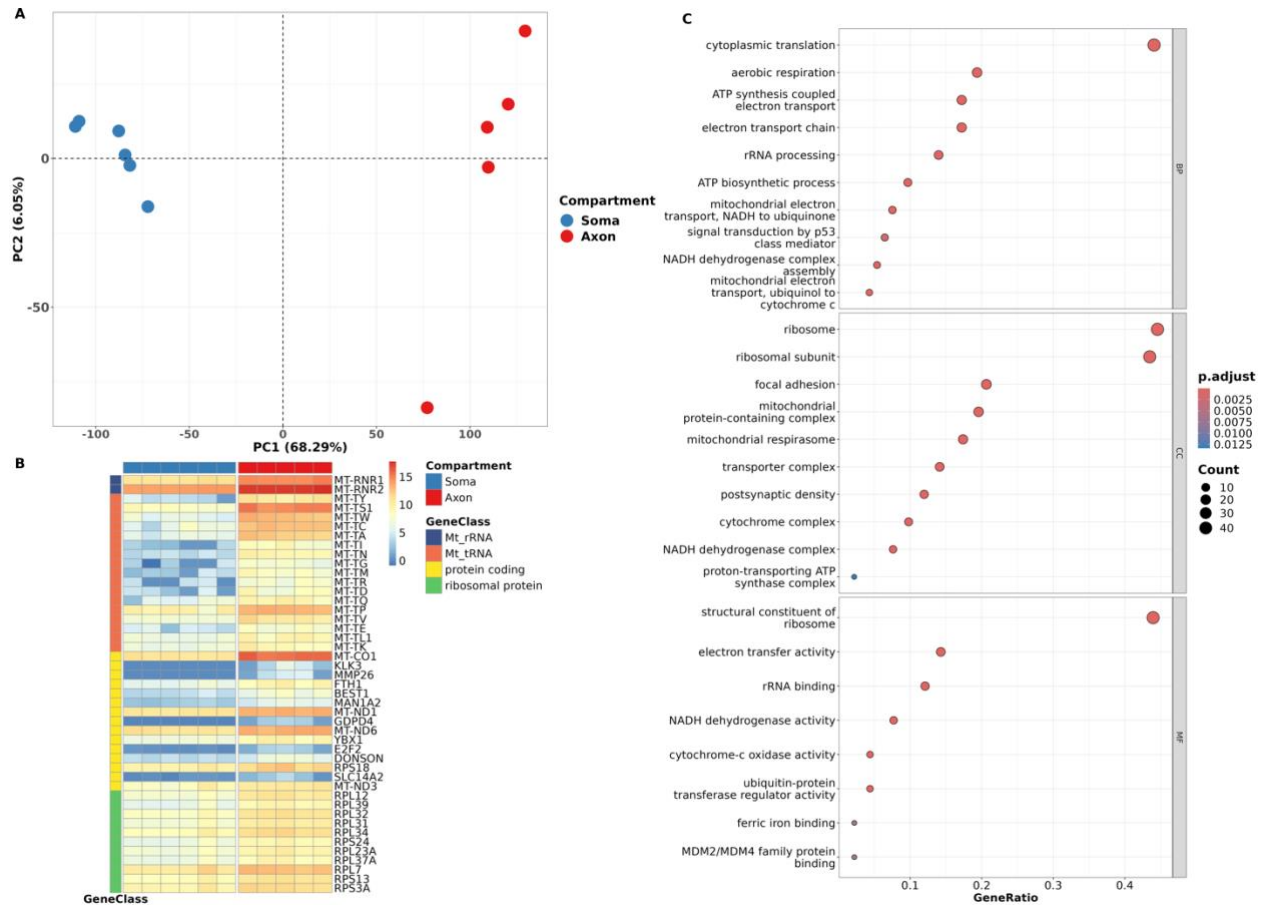

**Figure 2: Axonal transcriptome of WT CNs is distinct from the soma transcriptome. A.** PCA of gene expression reveals a clear separation of soma (blue) and axonal compartments (red; PC1). **B.** Expression(log<sub>2</sub>(TPM)) of top genes that are higher expressed in the axonal (red, right column) compared to the soma compartment (blue, left column) (adjusted  $p$ -value<0.05, logFC>2). Genes are grouped by gene class (purple: mitochondrial (Mt)\_rRNA; orange: Mt\_tRNA; yellow: protein coding; green: ribosomal protein (RP)). **C.** Gene ontology (GO) term enrichment analysis of axon-enriched genes connected to protein coding or RP genes primarily spotlighted mitochondrial processes and ribosome processes functions. BP: biological process; CC: cellular component; MF: molecular function.

### Human motor axons show a unique transcription factor profile

Recent studies have highlighted that transcription factor (TF) mRNAs present in axons can be translated, undergo retrograde transport and alter gene transcription (Cox *et al.*, 2008; Wizenmann *et al.*, 2009; Ben-Yaakov *et al.*, 2012; Ji & Jaffrey, 2012; Guillaud *et al.*, 2020; Leboeuf *et al.*, 2023). To explore this further, we evaluated expression of a diverse range of TF mRNAs from various organisms in our WT dataset (Shen *et al.*, 2023). Upon analyzing the top 50 expressed TF mRNAs separately in axons and somas, we discovered a shared set of 25 TF mRNAs between the two compartments, including key factors like *YBX1*, *SOX4*,

*THY1*, and *SUB1* (Figure 3). In addition to these shared TF mRNAs, each compartment exhibited 25 unique top expressed TF mRNAs, highlighting the specificity of their transcriptional landscapes. Specifically, *GTF3A* and *ATF4* were identified as the leading axonal TF mRNAs, both well-known for their roles in the nucleus initiating transcription (Seifart *et al.*, 1989; Anuraga *et al.*, 2021) (Figure 3). Moreover, *CREB3* emerged as the most prominent TF mRNA in the soma, playing a crucial role in myelination and axonal growth (Figure 3) (Hasmatali *et al.*, 2019; Sampieri *et al.*, 2019).

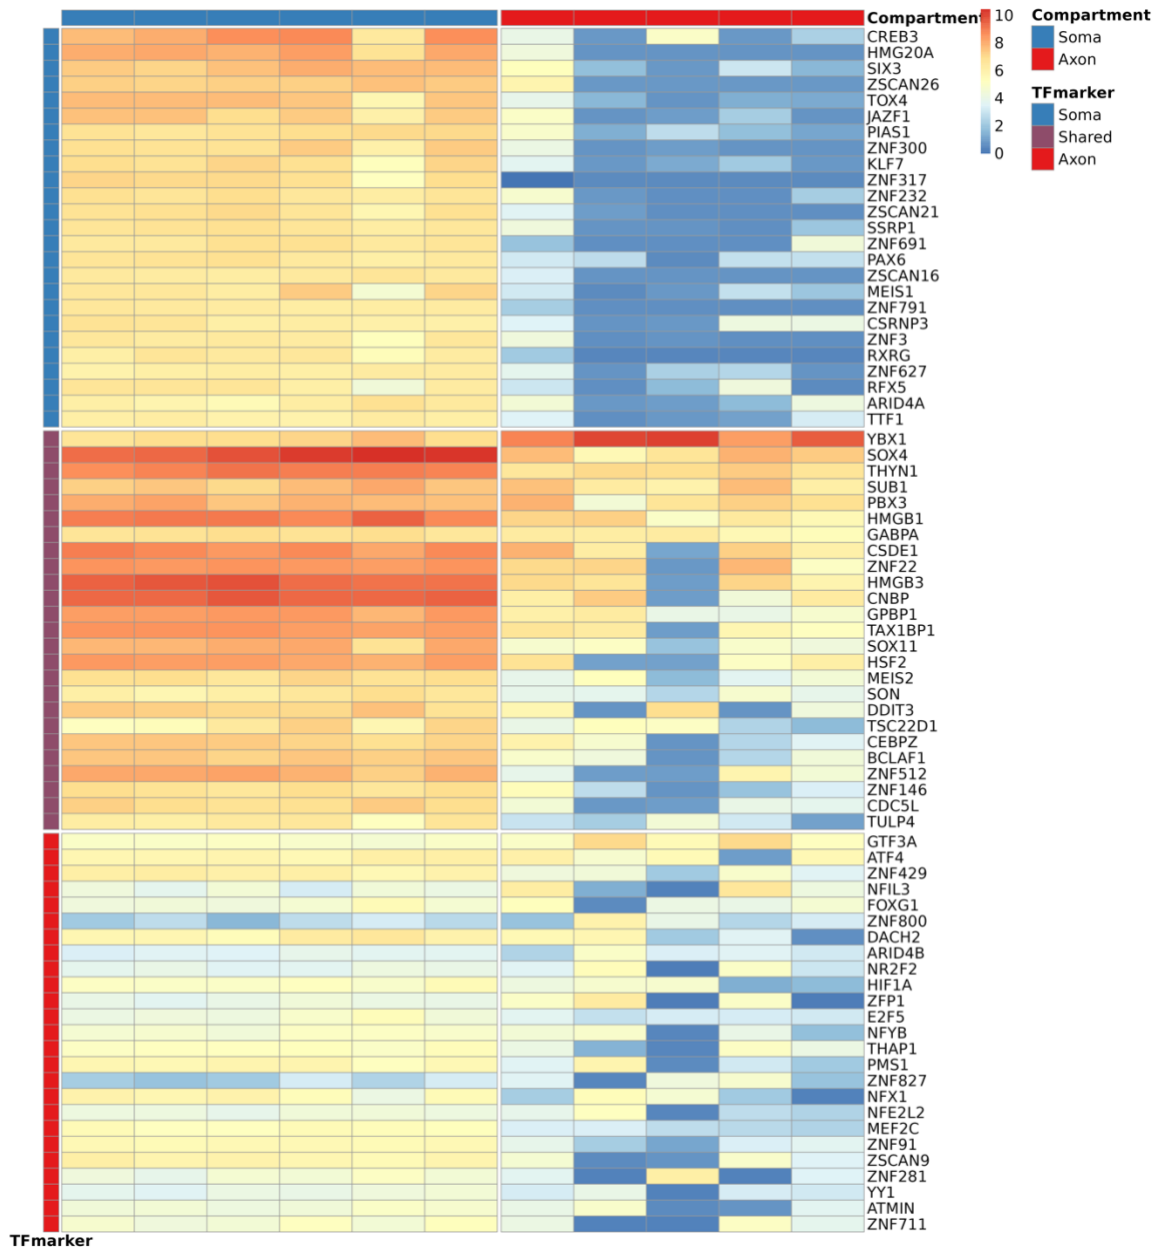

**Figure 3. Axon and soma present with specific TF mRNAs.** Top expressed transcription factor (TF) mRNAs in the soma compartment (blue, top row), shared (purple, middle row) and axon compartment (red, bottom row), and expression in soma (blue, left column) and axon compartment (red, right column) of iPSC-

derived WT CNs. *CREB3* is the top expressed in the soma compartment, while *YBX1*, *SOX4*, *SUB1* and *THYN1* are shared between axon and soma, and *GTF3A* is top expressed in the axon compartment.

### *KIF1C* modulates the axonal transcriptome

*KIF1C*-deficiency causes HSP, a disorder associated with prominent length-dependent degeneration of central MN axons. As *KIF1C* has recently been implicated in long-range transport of mRNAs and the EJC (Pichon *et al.*, 2021; Nagel *et al.*, 2022; Norris & Mendell, 2023), we studied the axonal transcriptome of *KIF1C*-knockout (*KIF1C-KO*) iPSC-derived CNs to highlight transcripts and pathways essential for MN degeneration and maintenance. As hypothesized, both axonal and soma compartments in the *KIF1C-KO* cells exhibited markedly reduced *KIF1C* expression when compared with WTs (Figure 4A). Looking at the total gene counts, *KIF1C-KO* axons exhibited expression of  $5,099 \pm 1,642$  genes, while WT axon samples displayed  $5,075 \pm 2080$  genes. In the soma we detected  $16,207 \pm 981$  genes in *KIF1C-KO* CNs and  $16,118 \pm 862$  in the WT (Supplementary Table S3). For differential expression analysis, we included genes with a TPM>1 in at least three samples across combined conditions. Ablation of *KIF1C* resulted in a statistically significant differential expression ( $p$ -value<0.001) of 189 genes within the axon compared to WT axons (Supplementary Figure S6). Intriguingly, only 12 of these also displayed dysregulation in the soma of *KIF1C-KO* CNs (Supplementary Figure S6A, B). Interestingly, 89 genes showed decreased expression in the axon of *KIF1C-KO* CNs, while the remaining 100 exhibited increased expression (Supplementary Figure S6A, B). Furthermore, 21 of the 89 downregulated genes were protein-coding and were totally absent in *KIF1C-KO* CNs (Figure 4C).

Among the transcripts absent or severely downregulated in *KIF1C-KO* CN axons are several key transcripts critical for neuronal and axonal functions (Figure 4C). These transcripts include *ESYT2*, known to play a role in synaptic growth and neurotransmission, *LG12*, involved in inhibitory synapse assembly (Contreras *et al.*, 2019; Kozar-Gillan *et al.*, 2023), *NAB1*, a transcriptional repressor with a role in synaptic active zone assembly (Srinivasan *et al.*, 2007; Chia *et al.*, 2012), *PHLDA1*, involved in injury response (El Soury *et al.*, 2018), *CLCC1*, involved in misfolded protein clearance (Jia *et al.*, 2015), *THAP1*, implicated in dystonia (DYT6, # 602629) (Cheng *et al.*, 2020), and *SLITRK4*, involved in controlling excitatory and inhibitory synapse formation (Yim *et al.*, 2013). Additionally, a sub-group of the downregulated genes in the axons of *KIF1C-KO* CNs appear to be involved in axonal pathways. For example, *PPP3CB* is catalogued under KEGG's axon guidance pathway, while *SLITRK4*, *PAX6*, *MAPK8*, and *CLCN3* are enshrined within the GO term's axon-related gene set (Table 1).

It has been previously described that *KIF1C* plays a role in localizing APC-target mRNAs to cytoplasmic protrusion (Preitner *et al.*, 2014). However, only two known targets of APC, *CTNBN1* and *HSD17B12*, were specifically downregulated in axons of *KIF1C-KO* CNs (Figure 4B).

Taken together, these data show that *KIF1C* plays an important role in the axonal and soma transcriptome and loss of *KIF1C* in CNs leads to widespread transcriptional changes with implications in critical neuronal and axonal functions.

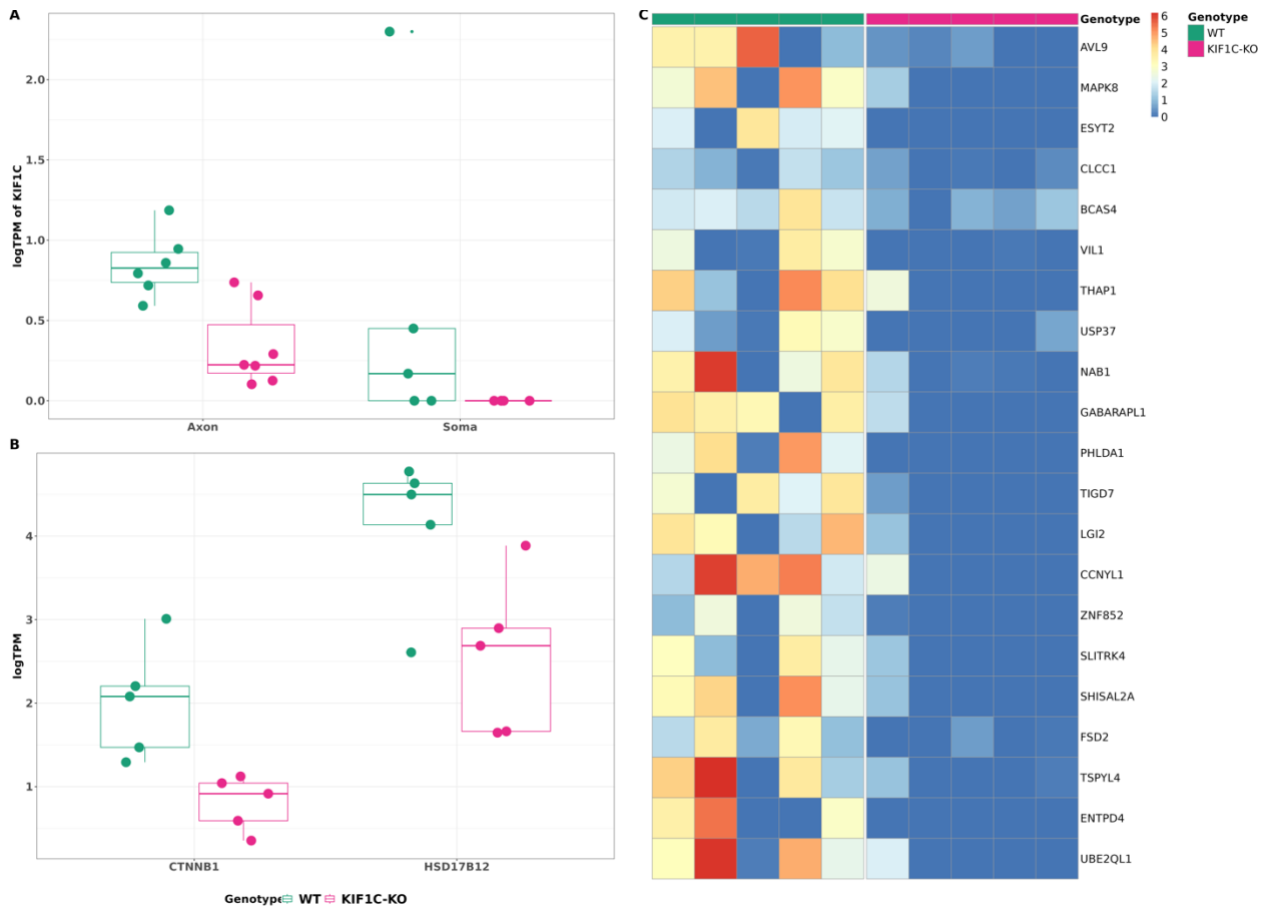

**Figure 4. *KIF1C* modulates the axonal transcriptome.** **A.** *KIF1C* expression is reduced in the axon and soma compartment of *KIF1C-KO* (magenta) compared to WT CNs (teal). Data is presented as median and interquartile range. **B.** Two APC target genes show decreased expression in the axons of *KIF1C-KO* compared to WT CNs (WT: teal, *KIF1C-KO*: magenta). Data is presented as median and interquartile range. **C.** Heatmap of protein-coding genes that are absent in axons of *KIF1C-KO* compared to WT CNs.

| Dysregulation | Gene                 | Geneset or Pathway                          |
|---------------|----------------------|---------------------------------------------|
| Downregulated | <i>PPP3CB</i>        | KEGG_AXON_GUIDANCE<br>GOBP_AXON_DEVELOPMENT |
| Downregulated | <i>SLITRK4, PAX6</i> | GOBP_AXON_DEVELOPMENT                       |
| Downregulated | <i>CLCN3</i>         | GOCC_AXON, GOCC_DISTAL_AXON                 |
| Downregulated | <i>MAPK8</i>         | GOCC_AXON                                   |

**Table 1:** Pathways or gene sets curated for downregulated genes in *KIF1C-KO* axon connected to axon guidance or development.

## Discussion

Axonal RNA biology is increasingly implicated in the healthy and diseased CNS. Here, we generated high-quality and pure axonal transcriptomes from iPSC-derived CNs, using a previously developed RNA-Seq approach (Nijssen *et al.*, 2018), and careful application of bioinformatic QC. We detected a significantly lower number of genes in our axon samples than previously published (Briese *et al.*, 2016; Rotem *et al.*, 2017). However, the latter datasets showed high contamination of the axonal compartments by other cellular components or non-neuronal cells. Interestingly, our numbers correspond with a more recently published dataset, showing high specificity and low contamination (Nijssen *et al.*, 2018). We did see a slight increase in number of genes in both compartments compared to Nijssen *et al.*, which is likely a benefit of the different lysis protocol, longer paired end reads and deeper sequencing we utilized (Nijssen *et al.*, 2018). Additionally, our data did not show glia or proliferative markers, suggesting highly specific neuronal and axonal cultures.

Our comprehensive transcriptomic analysis revealed distinct transcriptional landscapes in the axon and soma compartment. While most detected genes specific to the soma compartment represent protein-coding mRNAs, involved in functions essential for neuronal survival and maintenance, axonal compartments showed a more variable range of gene types, including protein coding mRNAs, RPs, mitochondrial encoded RNAs and lncRNAs. Recent work has provided evidence that local translation of mRNAs in the axons plays an important role in neuronal development, function, plasticity and disease (Li *et al.*, 2021). Local translation is regulated by various mechanisms: binding of extrinsic cues to their receptors on the cell surface of axons can trigger local translation (Koppers *et al.*, 2019), or chemical signaling through specific cues can activate kinases and phosphorylate RNA-binding-proteins resulting in mRNA translation (Sasaki *et al.*, 2010). Interestingly, extrinsic cues like growth factors and nutrients have been shown to activate mTOR signaling which in turn increases translation of axonal mRNAs (Sonenberg & Hinnebusch, 2009; Hornberg & Holt, 2013). Previous work has shown that RPs are enriched in axons (Zivraj *et al.*, 2010), a finding we confirm in this paper. While their function remains largely unknown, it is possible that they could repair ribosomes or renew components in already assembled ribosomes (Jung *et al.*, 2014). Strengthening this hypothesis, it has been shown that mRNAs encoding RPs are present and locally translated in axons and can be incorporated into axonal ribosomes in a nucleolus-independent manner (Shigeoka *et al.*, 2019). Of note, we detected the presence of lncRNAs in the axonal compartment. Recently a lncRNA has been found to be actively involved in local axonal translation (Wei *et al.*, 2021), suggesting that lncRNAs in axons have specific functions. The distinct mRNA profile in axons, including nuclear encoded transcripts related to ribosomal subunits, respiratory chain complex, ion transport, and mRNA splicing genes, emphasizes the unique metabolic and synthetic demands of this compartment. This aligns with the hypothesis that axons, despite their dependence on the soma, maintain a degree of autonomy in

protein synthesis and energy production, which is crucial for their function and health. Transcripts found in both compartments, were largely consisting of mitochondrially encoded genes related to NADH metabolism (*e.g.*, *MT-ND1,2,4*, *NDUFA1*), the mitochondrial respiratory chain (*e.g.*, *MT-CO1-3*, *MT-CYB*), or mitochondrial ribosomal functions (*e.g.*, *MT-RNR1&2*, *RPL12*). The rest of the shared signatures were related to cytoskeletal or microtubule organization (*TMSB10*, *STMN1*, *STMN2*, *TUBA1A*), and homeostasis/signaling pathways (*e.g.*, *FTL*, *GAPDH*, *DAD1*). These signatures likely reflect the high energy and organizational demands of axon and soma. Interestingly, only one shared gene was related to neurite formation, axon growth, regeneration and plasticity (*GAP43*) (Chung *et al.*, 2020). While the role of *GAP43* in the soma is well described, more recently, axonal protein synthesis of *GAP43* was shown to promote axon growth (Donnelly *et al.*, 2013; Chung *et al.*, 2020).

Recent work has shown that TF mRNAs are not only involved in defining neuronal identity in early development and during survival but function outside the soma. They can be locally synthesized and retrogradely transported back to the nucleus, where they can influence gene transcription and be involved in plasticity, axon pathfinding and neuroprotection ((Sgado *et al.*, 2006; Cox *et al.*, 2008; Sugiyama *et al.*, 2008; Wizenmann *et al.*, 2009; Torero Ibad *et al.*, 2011; Ben-Yaakov *et al.*, 2012; Ji & Jaffrey, 2012; Kadkhodaei *et al.*, 2013). Therefore, we performed in-depth analysis of enriched TF mRNAs specific to either compartment or common between them. We found that highly expressed TF mRNAs in the soma were related to neural differentiation, morphogenesis, maturation and survival. Of note, two TF mRNAs have been found to be involved in myelination and axonal growth (*RXRG* and *CREB3* (Huang *et al.*, 2011; Hasmatali *et al.*, 2019; Sampieri *et al.*, 2019)), likely reflecting the ongoing growth of axons *in vitro*. In contrast, many TF mRNAs detected in the axonal compartment were related to axon guidance and/or axonal/neuronal regeneration. This is not surprising as several studies have demonstrated that local translation in axons can promote cytoskeletal and membranous growth (Hengst & Jaffrey, 2007; Hengst *et al.*, 2009; Gracias *et al.*, 2014). We further detected *YBX1* in the axon and soma. Interestingly, *Ybx1* has been found to be enriched specifically in distal motor axons of mice (Nijssen *et al.*, 2018). *YBX1* plays an important role in binding and stabilizing cytoplasmic mRNAs, regulating translation and it can mediate anterograde axonal transport (Lyabin *et al.*, 2014; Kar *et al.*, 2017). Therefore, it is plausible that it can act as an important mediator between axon and soma. Additionally, we found *GTF3A* and *ATF4* enriched in the axonal compartment. These TFs are traditionally linked to transcription initiation and stress response in the nucleus (Seifart *et al.*, 1989; Anuraga *et al.*, 2021). Importantly, *ATF4*, has previously been shown to be locally synthesized in the axon and retrogradely transported to the soma (Trinh *et al.*, 2012; Baleriola *et al.*, 2014; Vasudevan *et al.*, 2020), suggesting that other TF mRNAs traditionally viewed as nuclear may be, too. In line with this, we detected a substantial number of TF mRNAs with unknown (*e.g.*, *ZNF429*, *ZNF800*, *ZSCAN9*), or nucleus-related functions, like transcription, cell cycle progression and cell

proliferation (e.g., *ATMIN*, *NFX1*, *THAP1*, *E2F5*, *NR2F2*) in the axon. The discovery of these TF mRNAs signifies a major advancement in our understanding of the molecular mechanisms underpinning axonal functions. These findings not only challenge conventional views of axons as mere passive conduits but also highlight their role as active sites of complex regulatory activities. The potential intra-axonal translation and retrograde transport of translated TFs unveils a dynamic aspect of axons, where they adaptively respond to both internal and external stimuli. This novel paradigm in neuronal biology raises critical questions about the functional roles of TFs within axonal compartments, diverging from their established nuclear functions. To further investigate changes of the axonal compartment in diseased condition and thus gain an understanding in axonal transcripts essential for axon maintenance, we investigated *KIF1C-KO* CNs. *KIF1C*, a kinesin family member, is implicated in hereditary spastic paraplegia (HSP), a group of heterogenous genetic disorder resulting in degeneration of upper MN axons (Stevanin *et al.*, 2008; Caballero Oteyza *et al.*, 2014; Dor *et al.*, 2014; Novarino *et al.*, 2014; Klebe *et al.*, 2015; Blackstone, 2018). Indeed, loss of *KIF1C* led to widespread changes of the transcriptome, showing axon-specific effects. This may be explained, as *KIF1C* is the fastest human cargo transporter, and is implicated in long range and highly dynamic transport (Lipka *et al.*, 2016). It has long been appreciated that axonal transport is important for survival and health of neurons and disturbance in axonal transport is a key pathological event that contributes to diverse neurodegenerative diseases like AD, polyglutamine diseases, HSPs, ALS, PD, and Charcot-Marie-Tooth (CMT) disease (Perlson *et al.*, 2010; Millecamps & Julien, 2013). Additionally, mutations in motor proteins like *KIF5A*, dynein and dynactin have been shown to cause neurodegeneration (Puls *et al.*, 2003; Munch *et al.*, 2004; Weedon *et al.*, 2011; Cady *et al.*, 2015; Konno *et al.*, 2017), strongly supporting the view that defective axonal transport can directly trigger neurodegeneration. Therefore, spatial dysregulation of transcription due to *KIF1C* loss may uncover transcriptional changes also relevant in other neurodegenerative diseases.

*KIF1C* has previously been shown to transport APC-dependent mRNAs to cell protrusion and it is implicated in the transport of the EJC in neuronal SH-SY5Y cells (Pichon *et al.*, 2021; Nagel *et al.*, 2022). Therefore, it is not surprising that we see the near complete absence of several key transcripts critical for neuronal and axonal function in axons of *KIF1C-KO* CNs. Interestingly, even though *KIF1C* has been shown to transport mRNAs in an APC-dependent manner, only a subset of the detected missing factors was connected to APC-dependent transport. One explanation for this may be that different motors can be used in different cell types: the transport of  $\beta$ -actin mRNA, which accumulates at the leading edge of migrating cells, involves several motors that display cell type and compartment specificity, differing between neurons and fibroblasts (Singer, 1993; Latham *et al.*, 2001; Fusco *et al.*, 2003; Oleynikov & Singer, 2003; Condeelis & Singer, 2005; Ma *et al.*, 2011; Nalavadi *et al.*, 2012; Liao *et al.*, 2015; Song *et al.*, 2015). Interestingly, in mouse fibroblasts, APC-dependent RNAs were involved in pathways functionally relevant to cell

movement (Wang *et al.*, 2017). However, in this study, genes related to APC-dependent transport did not display functional relevance for movement. Instead, most downregulated RNAs in *KIF1C-KO* axons were related to neurotransmission, the synaptic zone, and misfolded protein clearance. Since the previously mentioned investigations regarding *KIF1C* have been performed in other cell types (Wang *et al.*, 2017; Pichon *et al.*, 2021; Nagel *et al.*, 2022; Norris & Mendell, 2023), it is possible that *KIF1C*-dependent transport in CNs uses different motors, independent of APC. However, by which mechanism transport in CNs is conducted needs to be subject of future investigations.

Taken together, our findings regarding *KIF1C* provide novel insights into the role of motor proteins in axonal transcriptome modulation. Importantly, genes and TFs dysregulated due to *KIF1C* loss may also be implicated in other neurodegenerative diseases.

### *Conclusion*

Collectively, our study not only affirms the transcriptional distinctiveness of axonal and soma compartments in iPSC-derived CNs but also sheds light on the intricate molecular machinery governing these compartments. The identification of not only compartment-specific gene expression patterns but also compartment-specific TF mRNAs, and the role of *KIF1C* in modulating these, have significant implications for our understanding of neuronal biology and the pathophysiology of MN diseases. Future research focusing on the functional implications of these transcriptional differences and the potential of targeting specific pathways within axons could pave the way for novel therapeutic approaches in neurodegenerative diseases.



## *Methods*

### *Differentiation of iPSCs to CNs*

Human induced pluripotent stem cells (iPSCs) were approved for use by the Institutional Review Boards, University of Tübingen Medical School, Germany (approval number: 423/2019BO1). The *KIF1C-KO* line (homozygous knockout; (Nagel *et al.*, 2020)) and isogenic control line were grown in essential 8 (E8) medium on diluted Matrigel® solution (1:60, Corning®) coated 6-well plates at 37°C, 5% CO<sub>2</sub> and 100% relative humidity. Medium was changed daily. Cells were differentiated into cortical neurons of layers V and VI. The differentiation followed previously established protocols (Hauser *et al.*, 2020; Nagel *et al.*, 2020; Schuster *et al.*, 2020). Briefly, iPSCs were seeded at a density of  $3 \times 10^5$  cells/cm<sup>2</sup> on Matrigel-coated plates (Corning®), in E8 medium supplemented with 10µM SB431542 (Sigma-Aldrich) and 500nM LDN-193189 (Sigma-Aldrich). The cells underwent neural induction over 9 days. Post induction, on Day 9, the cells were split at a 1:3 ratio and then cultured in 3N medium with 20ng/mL FGF-2 for an additional 2 days. From Day 11 to Day 26 after induction (DAI 11-26), cells were maintained in 3N medium, with medium changes occurring bi-daily. On DAI 26, the cells were transferred to microfluidic chambers (XC950, Xona Microfluidics) for cultivation.

### *Culturing of cortical neurons (CNs) in microfluidic devices*

Microfluidic devices were set up following the procedure outlined by Nijssen *et al.* (Nijssen *et al.*, 2018). Briefly, both compartments of the device were precoated with XC Pre-Coat (Xona Microfluidics), with one compartment receiving a 1-minute incubation and the other a 5-minute incubation. Following the coating, the chambers were washed twice with phosphate-buffered saline (PBS), coated with Polyornithine, incubated at room temperature for 1 hour, and subsequently coated with a diluted Matrigel® solution (1:45, Corning®), followed by a 1-hour incubation at 37°C. After two washes with 3N Medium, the compartments were filled with 3N Medium supplemented with Rock inhibitor (RI, 1:1000) and maintained at 37°C until neuron loading. DAI26 neurons were washed with PBS, incubated with Accutase + RI for 20 minutes at 37°C, strained through a 70 µm cell strainer, and suspended in 5,5 ml 3N + RI medium.  $2 \times 10^5$  neurons were loaded into each microfluidic chamber. The next day, 10µM PD0325901 (Tocris) and 10µM DAPT (Sigma-Aldrich) were added to the soma compartment. Cells were kept in this media for four days with media change every two days, followed by incubation with 3N media. 10ng/ml of NGF, BDNF, and GDNF were added to the axonal compartment to attract axons. Media changes were implemented three times per week, and fluid volumes were adjusted to ensure cross-chamber flow and to establish a trophic factor gradient from axonal to somatic compartments. Of note, the soma compartment contains not only cell bodies but also corresponding axonal fractions. For simplicity purposes we will refer to this compartment as soma compartment throughout this paper.

### *Harvesting*

At day after induction (DAI) 58, the compartments were washed with PBS. For the axonal compartment, 5µl NEBNext Cell Lysis Buffer (NEB, Massachusetts, U.S.), were added directly into the corresponding microgroove. After 3 minutes, the solution was mixed and snap-frozen on dry ice. The soma compartment was lysed using 50µl RLT buffer (Qiagen, Venlo, Netherlands), collected and snap frozen using dry ice. Soma RNA was purified using the RNeasy Mini Kit (Qiagen, Venlo, Netherlands) following the manufacturer's instructions.

### *RNA Seq library construction*

Due to the low amount of RNA available in the axon fraction, lysate of approximately 500 cell was performed in 5 µl of the NEBNext Cell Lysis Buffer and used in the NEBNext Single Cell/Low Input RNA library Prep Kit Low Input following the protocol for Cell instruction. The library molarity was determined by measuring the library size (approximately 330 bp) using the Fragment Analyzer 5300 and the Fragment Analyzer DNA HS NGS fragment kit (Agilent Technologies) and the library concentration (>2 ng/µl) using Qubit Fluorometric Quantitation and dsDNA High sensitivity assay (Thermo Fisher Scientific). The libraries were denatured according to the manufacturer's instructions, diluted to 270 pM and sequenced as paired end 100bp reads on an Illumina NovaSeq 6000 (Illumina). The sequencing aimed to achieve a depth of approximately >15 million clusters per sample.

### *Short reads RNA-seq processing and differential gene expression analysis*

Raw RNA-Seq data were processed using the megSAP pipeline, which includes quality control and adapter removal of fastq files. The reads were then aligned to the reference genome using STAR (version 2.7.10a)(32). Gene and transcript expression quantification was performed using FeatureCount (version N). Transcript and gene abundances were expressed as TPM values.

To identify differentially expressed genes between soma and axon compartments of control lines, we first filtered out lowly expressed genes by keeping only those with at least 1 TPM value in at least 3 samples in each compartment. The filtered TPM matrix was taken as a log<sub>2</sub> transformation. Differential expression analysis was performed using the Limma-Voom module. For the enrichment analysis of Gene Ontology (GO) terms, we utilized the ReactomePA package in R (version 4.3). This analysis encompassed the evaluation of significantly enriched pathways within the categories of Biological Processes (BP), Cellular Components (CC), and Molecular Functions (MF). The most significantly enriched pathways were meticulously assessed, and the top distinguished functional pathways were selected for visualization.

## References

- Anuraga, G., Tang, W.C., Phan, N.N., Ta, H.D.K., Liu, Y.H., Wu, Y.F., Lee, K.H. & Wang, C.Y. (2021) Comprehensive Analysis of Prognostic and Genetic Signatures for General Transcription Factor III (GTF3) in Clinical Colorectal Cancer Patients Using Bioinformatics Approaches. *Curr Issues Mol Biol*, **43**, 2-20.
- Baleriola, J., Walker, C.A., Jean, Y.Y., Crary, J.F., Troy, C.M., Nagy, P.L. & Hengst, U. (2014) Axonally synthesized ATF4 transmits a neurodegenerative signal across brain regions. *Cell*, **158**, 1159-1172.
- Ben-Yaakov, K., Dagan, S.Y., Segal-Ruder, Y., Shalem, O., Vuppalandhi, D., Willis, D.E., Yudin, D., Rishal, I., Rother, F., Bader, M., Blesch, A., Pilpel, Y., Twiss, J.L. & Fainzilber, M. (2012) Axonal transcription factors signal retrogradely in lesioned peripheral nerve. *EMBO J*, **31**, 1350-1363.
- Bentley, M. & Banker, G. (2016) The cellular mechanisms that maintain neuronal polarity. *Nat Rev Neurosci*, **17**, 611-622.
- Bhuwania, R., Castro-Castro, A. & Linder, S. (2014) Microtubule acetylation regulates dynamics of KIF1C-powered vesicles and contact of microtubule plus ends with podosomes. *Eur J Cell Biol*, **93**, 424-437.
- Blackstone, C. (2018) Hereditary spastic paraplegia. *Handb Clin Neurol*, **148**, 633-652.
- Briese, M., Saal, L., Appenzeller, S., Moradi, M., Baluapuri, A. & Sendtner, M. (2016) Whole transcriptome profiling reveals the RNA content of motor axons. *Nucleic Acids Res*, **44**, e33.
- Caballero Oteyza, A., Battaloglu, E., Ocek, L., Lindig, T., Reichbauer, J., Rebelo, A.P., Gonzalez, M.A., Zorlu, Y., Ozes, B., Timmann, D., Bender, B., Woehlke, G., Zuchner, S., Schols, L. & Schule, R. (2014) Motor protein mutations cause a new form of hereditary spastic paraplegia. *Neurology*, **82**, 2007-2016.
- Cady, J., Allred, P., Bali, T., Pestronk, A., Goate, A., Miller, T.M., Mitra, R.D., Ravits, J., Harms, M.B. & Baloh, R.H. (2015) Amyotrophic lateral sclerosis onset is influenced by the burden of rare variants in known amyotrophic lateral sclerosis genes. *Ann Neurol*, **77**, 100-113.
- Cheng, F., Walter, M., Wassouf, Z., Hentrich, T., Casadei, N., Schulze-Hentrich, J., Barbuti, P., Krueger, R., Riess, O., Grundmann-Hauser, K. & Ott, T. (2020) Unraveling Molecular Mechanisms of THAP1 Missense Mutations in DYT6 Dystonia. *J Mol Neurosci*, **70**, 999-1008.
- Chia, P.H., Patel, M.R. & Shen, K. (2012) NAB-1 instructs synapse assembly by linking adhesion molecules and F-actin to active zone proteins. *Nat Neurosci*, **15**, 234-242.
- Chung, D., Shum, A. & Caraveo, G. (2020) GAP-43 and BASP1 in Axon Regeneration: Implications for the Treatment of Neurodegenerative Diseases. *Front Cell Dev Biol*, **8**, 567537.
- Condeelis, J. & Singer, R.H. (2005) How and why does beta-actin mRNA target? *Biol Cell*, **97**, 97-110.

- Contreras, A., Hines, D.J. & Hines, R.M. (2019) Molecular Specialization of GABAergic Synapses on the Soma and Axon in Cortical and Hippocampal Circuit Function and Dysfunction. *Front Mol Neurosci*, **12**, 154.
- Cox, L.J., Hengst, U., Gurskaya, N.G., Lukyanov, K.A. & Jaffrey, S.R. (2008) Intra-axonal translation and retrograde trafficking of CREB promotes neuronal survival. *Nat Cell Biol*, **10**, 149-159.
- del Rio, R., McAllister, R.D., Meeker, N.D., Wall, E.H., Bond, J.P., Kyttaris, V.C., Tsokos, G.C., Tung, K.S. & Teuscher, C. (2012) Identification of Orch3, a locus controlling dominant resistance to autoimmune orchitis, as kinesin family member 1C. *PLoS Genet*, **8**, e1003140.
- Denny, J.B. (2006) Molecular mechanisms, biological actions, and neuropharmacology of the growth-associated protein GAP-43. *Curr Neuropharmacol*, **4**, 293-304.
- Donnelly, C.J., Park, M., Spillane, M., Yoo, S., Pacheco, A., Gomes, C., Vuppalachchi, D., McDonald, M., Kim, H.H., Merianda, T.T., Gallo, G. & Twiss, J.L. (2013) Axonally synthesized beta-actin and GAP-43 proteins support distinct modes of axonal growth. *J Neurosci*, **33**, 3311-3322.
- Dor, T., Cinnamon, Y., Raymond, L., Shaag, A., Bouslam, N., Bouhouche, A., Gaussen, M., Meyer, V., Durr, A., Brice, A., Benomar, A., Stevanin, G., Schuelke, M. & Edvardson, S. (2014) KIF1C mutations in two families with hereditary spastic paraparesis and cerebellar dysfunction. *J Med Genet*, **51**, 137-142.
- Efimova, N., Grimaldi, A., Bachmann, A., Frye, K., Zhu, X., Feoktistov, A., Straube, A. & Kaverina, I. (2014) Podosome-regulating kinesin KIF1C translocates to the cell periphery in a CLASP-dependent manner. *J Cell Sci*, **127**, 5179-5188.
- El Soury, M., Fornasari, B.E., Morano, M., Grazio, E., Ronchi, G., Incarnato, D., Giacobini, M., Geuna, S., Provero, P. & Gambarotta, G. (2018) Soluble Neuregulin1 Down-Regulates Myelination Genes in Schwann Cells. *Front Mol Neurosci*, **11**, 157.
- Ferri, A., Sanes, J.R., Coleman, M.P., Cunningham, J.M. & Kato, A.C. (2003) Inhibiting axon degeneration and synapse loss attenuates apoptosis and disease progression in a mouse model of motoneuron disease. *Curr Biol*, **13**, 669-673.
- Fischer, L.R., Culver, D.G., Tennant, P., Davis, A.A., Wang, M., Castellano-Sanchez, A., Khan, J., Polak, M.A. & Glass, J.D. (2004) Amyotrophic lateral sclerosis is a distal axonopathy: evidence in mice and man. *Exp Neurol*, **185**, 232-240.
- Fusco, D., Accornero, N., Lavoie, B., Shenoy, S.M., Blanchard, J.M., Singer, R.H. & Bertrand, E. (2003) Single mRNA molecules demonstrate probabilistic movement in living mammalian cells. *Curr Biol*, **13**, 161-167.
- Gracias, N.G., Shirkey-Son, N.J. & Hengst, U. (2014) Local translation of TC10 is required for membrane expansion during axon outgrowth. *Nat Commun*, **5**, 3506.
- Guillaud, L., El-Agamy, S.E., Otsuki, M. & Terenzio, M. (2020) Anterograde Axonal Transport in Neuronal Homeostasis and Disease. *Front Mol Neurosci*, **13**, 556175.

- Gumy, L.F., Yeo, G.S., Tung, Y.C., Zivraj, K.H., Willis, D., Coppola, G., Lam, B.Y., Twiss, J.L., Holt, C.E. & Fawcett, J.W. (2011) Transcriptome analysis of embryonic and adult sensory axons reveals changes in mRNA repertoire localization. *RNA*, **17**, 85-98.
- Hasmatali, J.C.D., De Guzman, J., Zhai, R., Yang, L., McLean, N.A., Hutchinson, C., Johnston, J.M., Misra, V. & Verge, V.M.K. (2019) Axotomy Induces Phasic Alterations in Luman/CREB3 Expression and Nuclear Localization in Injured and Contralateral Uninjured Sensory Neurons: Correlation With Intrinsic Axon Growth Capacity. *J Neuropathol Exp Neurol*, **78**, 348-364.
- Hauser, S., Schuster, S., Heuten, E., Hoflinger, P., Admard, J., Schelling, Y., Velic, A., Macek, B., Ossowski, S. & Schols, L. (2020) Comparative Transcriptional Profiling of Motor Neuron Disorder-Associated Genes in Various Human Cell Culture Models. *Front Cell Dev Biol*, **8**, 544043.
- Hengst, U., Deglincerti, A., Kim, H.J., Jeon, N.L. & Jaffrey, S.R. (2009) Axonal elongation triggered by stimulus-induced local translation of a polarity complex protein. *Nat Cell Biol*, **11**, 1024-1030.
- Hengst, U. & Jaffrey, S.R. (2007) Function and translational regulation of mRNA in developing axons. *Semin Cell Dev Biol*, **18**, 209-215.
- Hornberg, H. & Holt, C. (2013) RNA-binding proteins and translational regulation in axons and growth cones. *Front Neurosci*, **7**, 81.
- Hörner, M., Groh, J., Klein, D., Ilg, W., Schols, L., Dos Santos, S., Bergmann, A., Klebe, S., Cauhape, M., Branchu, J., El Hachimi, K.H., Stevanin, G., Darios, F. & Martini, R. (2022) CNS-associated T-lymphocytes in a mouse model of Hereditary Spastic Paraplegia type 11 (SPG11) are therapeutic targets for established immunomodulators. *Exp Neurol*, **355**, 114119.
- Huang, J.K., Jarjour, A.A., Ffrench-Constant, C. & Franklin, R.J. (2011) Retinoid X receptors as a potential avenue for regenerative medicine in multiple sclerosis. *Expert Rev Neurother*, **11**, 467-468.
- Ji, S.J. & Jaffrey, S.R. (2012) Intra-axonal translation of SMAD1/5/8 mediates retrograde regulation of trigeminal ganglia subtype specification. *Neuron*, **74**, 95-107.
- Jia, Y., Jucius, T.J., Cook, S.A. & Ackerman, S.L. (2015) Loss of Clcc1 results in ER stress, misfolded protein accumulation, and neurodegeneration. *J Neurosci*, **35**, 3001-3009.
- Jung, H., Gkogkas, C.G., Sonenberg, N. & Holt, C.E. (2014) Remote control of gene function by local translation. *Cell*, **157**, 26-40.
- Kadkhodaei, B., Alvarsson, A., Schintu, N., Ramskold, D., Volakakis, N., Joodmardi, E., Yoshitake, T., Kehr, J., Decressac, M., Bjorklund, A., Sandberg, R., Svenningsson, P. & Perlmann, T. (2013) Transcription factor Nurr1 maintains fiber integrity and nuclear-encoded mitochondrial gene expression in dopamine neurons. *Proc Natl Acad Sci U S A*, **110**, 2360-2365.
- Kar, A.N., Vargas, J.N.S., Chen, C.Y., Kowalak, J.A., Gioio, A.E. & Kaplan, B.B. (2017) Molecular determinants of cytochrome C oxidase IV mRNA axonal trafficking. *Mol Cell Neurosci*, **80**, 32-43.

- Klebe, S., Stevanin, G. & Depienne, C. (2015) Clinical and genetic heterogeneity in hereditary spastic paraplegias: from SPG1 to SPG72 and still counting. *Rev Neurol (Paris)*, **171**, 505-530.
- Konno, T., Ross, O.A., Teive, H.A.G., Slawek, J., Dickson, D.W. & Wszolek, Z.K. (2017) DCTN1-related neurodegeneration: Perry syndrome and beyond. *Parkinsonism Relat Disord*, **41**, 14-24.
- Kopp, P., Lammers, R., Aepfelbacher, M., Woehlke, G., Rudel, T., Machuy, N., Steffen, W. & Linder, S. (2006) The kinesin KIF1C and microtubule plus ends regulate podosome dynamics in macrophages. *Mol Biol Cell*, **17**, 2811-2823.
- Koppers, M., Cagnetta, R., Shigeoka, T., Wunderlich, L.C., Vallejo-Ramirez, P., Qiaojin Lin, J., Zhao, S., Jakobs, M.A., Dwivedy, A., Minett, M.S., Bellon, A., Kaminski, C.F., Harris, W.A., Flanagan, J.G. & Holt, C.E. (2019) Receptor-specific interactome as a hub for rapid cue-induced selective translation in axons. *Elife*, **8**.
- Kozar-Gillan, N., Velichkova, A., Kanatouris, G., Eshed-Eisenbach, Y., Steel, G., Jaegle, M., Aunin, E., Peles, E., Torsney, C. & Meijer, D.N. (2023) LGI3/2-ADAM23 interactions cluster Kv1 channels in myelinated axons to regulate refractory period. *J Cell Biol*, **222**.
- Latham, V.M., Yu, E.H., Tullio, A.N., Adelstein, R.S. & Singer, R.H. (2001) A Rho-dependent signaling pathway operating through myosin localizes beta-actin mRNA in fibroblasts. *Curr Biol*, **11**, 1010-1016.
- Leboeuf, M., Vargas-Abonce, S.E., Peze-Hedsieck, E., Dupont, E., Jimenez-Alonso, L., Moya, K.L. & Prochiantz, A. (2023) ENGRAILED-1 transcription factor has a paracrine neurotrophic activity on adult spinal alpha-motoneurons. *EMBO Rep*, **24**, e56525.
- Lee, P.L., Ohlson, M.B. & Pfeffer, S.R. (2015) Rab6 regulation of the kinesin family KIF1C motor domain contributes to Golgi tethering. *Elife*, **4**.
- Li, H., Li, S.H., Yu, Z.X., Shelbourne, P. & Li, X.J. (2001) Huntingtin aggregate-associated axonal degeneration is an early pathological event in Huntington's disease mice. *J Neurosci*, **21**, 8473-8481.
- Li, L., Yu, J. & Ji, S.J. (2021) Axonal mRNA localization and translation: local events with broad roles. *Cell Mol Life Sci*, **78**, 7379-7395.
- Liao, G., Mingle, L., Van De Water, L. & Liu, G. (2015) Control of cell migration through mRNA localization and local translation. *Wiley Interdiscip Rev RNA*, **6**, 1-15.
- Libby, R.T., Li, Y., Savinova, O.V., Barter, J., Smith, R.S., Nickells, R.W. & John, S.W. (2005) Susceptibility to neurodegeneration in a glaucoma is modified by Bax gene dosage. *PLoS Genet*, **1**, 17-26.
- Lipka, J., Kapitein, L.C., Jaworski, J. & Hoogenraad, C.C. (2016) Microtubule-binding protein doublecortin-like kinase 1 (DCLK1) guides kinesin-3-mediated cargo transport to dendrites. *EMBO J*, **35**, 302-318.
- Lopez-Erauskin, J., Bravo-Hernandez, M., Presa, M., Baughn, M.W., Melamed, Z., Beccari, M.S., Agra de Almeida Quadros, A.R., Arnold-Garcia, O., Zuberi, A., Ling, K., Platoshyn, O., Nino-Jara, E., Ndayambaje, I.S., McAlonis-Downes, M., Cabrera, L., Artates, J.W., Ryan, J., Hermann, A.,

- Ravits, J., Bennett, C.F., Jafar-Nejad, P., Rigo, F., Marsala, M., Lutz, C.M., Cleveland, D.W. & Lagier-Tourenne, C. (2024) Stathmin-2 loss leads to neurofilament-dependent axonal collapse driving motor and sensory denervation. *Nat Neurosci*, **27**, 34-47.
- Lyabin, D.N., Eliseeva, I.A. & Ovchinnikov, L.P. (2014) YB-1 protein: functions and regulation. *Wiley Interdiscip Rev RNA*, **5**, 95-110.
- Ma, B., Savas, J.N., Yu, M.S., Culver, B.P., Chao, M.V. & Tanese, N. (2011) Huntingtin mediates dendritic transport of beta-actin mRNA in rat neurons. *Sci Rep*, **1**, 140.
- Millecamps, S. & Julien, J.P. (2013) Axonal transport deficits and neurodegenerative diseases. *Nat Rev Neurosci*, **14**, 161-176.
- Minis, A., Dahary, D., Manor, O., Leshkowitz, D., Pilpel, Y. & Yaron, A. (2014) Subcellular transcriptomics-dissection of the mRNA composition in the axonal compartment of sensory neurons. *Dev Neurobiol*, **74**, 365-381.
- Munch, C., Sedlmeier, R., Meyer, T., Homberg, V., Sperfeld, A.D., Kurt, A., Prudlo, J., Peraus, G., Hanemann, C.O., Stumm, G. & Ludolph, A.C. (2004) Point mutations of the p150 subunit of dynactin (DCTN1) gene in ALS. *Neurology*, **63**, 724-726.
- Nagel, M., Mussig, S., Hoflinger, P., Schols, L., Hauser, S. & Schule, R. (2020) Generation of the CRISPR/Cas9-mediated KIF1C knock-out human iPSC line HIHRSi003-A-1. *Stem Cell Res*, **49**, 102059.
- Nagel, M., Noss, M., Xu, J., Horn, N., Ueffing, M., Boldt, K. & Schuele, R. (2022) The kinesin motor KIF1C is a putative transporter of the exon junction complex in neuronal cells. *RNA*, **29**, 55-68.
- Nalavadi, V.C., Griffin, L.E., Picard-Fraser, P., Swanson, A.M., Takumi, T. & Bassell, G.J. (2012) Regulation of zipcode binding protein 1 transport dynamics in axons by myosin Va. *J Neurosci*, **32**, 15133-15141.
- Nijssen, J., Aguila, J., Hoogstraaten, R., Kee, N. & Hedlund, E. (2018) Axon-Seq Decodes the Motor Axon Transcriptome and Its Modulation in Response to ALS. *Stem Cell Reports*, **11**, 1565-1578.
- Norris, M.L. & Mendell, J.T. (2023) Localization of Kif1c mRNA to cell protrusions dictates binding partner specificity of the encoded protein. *Genes Dev*, **37**, 191-203.
- Novarino, G., Fenstermaker, A.G., Zaki, M.S., Hofree, M., Silhavy, J.L., Heiberg, A.D., Abdellateef, M., Rosti, B., Scott, E., Mansour, L., Masri, A., Kayserili, H., Al-Aama, J.Y., Abdel-Salam, G.M.H., Karminejad, A., Kara, M., Kara, B., Bozorgmehri, B., Ben-Omran, T., Mojahedi, F., El Din Mahmoud, I.G., Bouslam, N., Bouhouche, A., Benomar, A., Hanein, S., Raymond, L., Forlani, S., Mascaro, M., Selim, L., Shehata, N., Al-Allawi, N., Bindu, P.S., Azam, M., Gunel, M., Caglayan, A., Bilguvar, K., Tolun, A., Issa, M.Y., Schroth, J., Spencer, E.G., Rosti, R.O., Akizu, N., Vaux, K.K., Johansen, A., Koh, A.A., Megahed, H., Durr, A., Brice, A., Stevanin, G., Gabriel, S.B., Ideker, T. & Gleeson, J.G. (2014) Exome sequencing links corticospinal motor neuron disease to common neurodegenerative disorders. *Science*, **343**, 506-511.
- Oleynikov, Y. & Singer, R.H. (2003) Real-time visualization of ZBP1 association with beta-actin mRNA during transcription and localization. *Curr Biol*, **13**, 199-207.

- Perlson, E., Maday, S., Fu, M.M., Moughamian, A.J. & Holzbaur, E.L. (2010) Retrograde axonal transport: pathways to cell death? *Trends Neurosci*, **33**, 335-344.
- Perry, R.B. & Fainzilber, M. (2014) Local translation in neuronal processes--in vivo tests of a "heretical hypothesis". *Dev Neurobiol*, **74**, 210-217.
- Pichon, X., Moissoglu, K., Coleno, E., Wang, T., Imbert, A., Robert, M.C., Peter, M., Chouaib, R., Walter, T., Mueller, F., Zibara, K., Bertrand, E. & Mili, S. (2021) The kinesin KIF1C transports APC-dependent mRNAs to cell protrusions. *RNA*, **27**, 1528-1544.
- Preitner, N., Quan, J., Nowakowski, D.W., Hancock, M.L., Shi, J., Tcherkezian, J., Young-Pearse, T.L. & Flanagan, J.G. (2014) APC is an RNA-binding protein, and its interactome provides a link to neural development and microtubule assembly. *Cell*, **158**, 368-382.
- Puls, I., Jonnakuty, C., LaMonte, B.H., Holzbaur, E.L., Tokito, M., Mann, E., Floeter, M.K., Bidus, K., Drayna, D., Oh, S.J., Brown, R.H., Jr., Ludlow, C.L. & Fischbeck, K.H. (2003) Mutant dynactin in motor neuron disease. *Nat Genet*, **33**, 455-456.
- Rotem, N., Magen, I., Ionescu, A., Gershoni-Emek, N., Altman, T., Costa, C.J., Gradus, T., Pasmanik-Chor, M., Willis, D.E., Ben-Dov, I.Z., Hornstein, E. & Perlson, E. (2017) ALS Along the Axons - Expression of Coding and Noncoding RNA Differs in Axons of ALS models. *Sci Rep*, **7**, 44500.
- Rubin, C.I. & Atweh, G.F. (2004) The role of stathmin in the regulation of the cell cycle. *J Cell Biochem*, **93**, 242-250.
- Sampieri, L., Di Giusto, P. & Alvarez, C. (2019) CREB3 Transcription Factors: ER-Golgi Stress Transducers as Hubs for Cellular Homeostasis. *Front Cell Dev Biol*, **7**, 123.
- Sasaki, Y., Welshhans, K., Wen, Z., Yao, J., Xu, M., Goshima, Y., Zheng, J.Q. & Bassell, G.J. (2010) Phosphorylation of zipcode binding protein 1 is required for brain-derived neurotrophic factor signaling of local beta-actin synthesis and growth cone turning. *J Neurosci*, **30**, 9349-9358.
- Schuster, S., Heuten, E., Velic, A., Admard, J., Synofzik, M., Ossowski, S., Macek, B., Hauser, S. & Schols, L. (2020) CHIP mutations affect the heat shock response differently in human fibroblasts and iPSC-derived neurons. *Dis Model Mech*, **13**.
- Seifart, K.H., Wang, L., Waldschmidt, R., Jahn, D. & Wingender, E. (1989) Purification of human transcription factor IIIA and its interaction with a chemically synthesized gene encoding human 5 S rRNA. *J Biol Chem*, **264**, 1702-1709.
- Sgado, P., Alberi, L., Gherbassi, D., Galasso, S.L., Ramakers, G.M., Alavian, K.N., Smidt, M.P., Dyck, R.H. & Simon, H.H. (2006) Slow progressive degeneration of nigral dopaminergic neurons in postnatal Engrailed mutant mice. *Proc Natl Acad Sci U S A*, **103**, 15242-15247.
- Shen, W.K., Chen, S.Y., Gan, Z.Q., Zhang, Y.Z., Yue, T., Chen, M.M., Xue, Y., Hu, H. & Guo, A.Y. (2023) AnimalTFDB 4.0: a comprehensive animal transcription factor database updated with variation and expression annotations. *Nucleic Acids Res*, **51**, D39-D45.
- Shigeoka, T., Koppers, M., Wong, H.H., Lin, J.Q., Cagnetta, R., Dwivedy, A., de Freitas Nascimento, J., van Tartwijk, F.W., Strohl, F., Cioni, J.M., Schaeffer, J., Carrington, M., Kaminski, C.F., Jung,



- H., Harris, W.A. & Holt, C.E. (2019) On-Site Ribosome Remodeling by Locally Synthesized Ribosomal Proteins in Axons. *Cell Rep*, **29**, 3605-3619 e3610.
- Simpson, J.C., Joggerst, B., Laketa, V., Verissimo, F., Cetin, C., Erfle, H., Bexiga, M.G., Singan, V.R., Heriche, J.K., Neumann, B., Mateos, A., Blake, J., Bechtel, S., Benes, V., Wiemann, S., Ellenberg, J. & Pepperkok, R. (2012) Genome-wide RNAi screening identifies human proteins with a regulatory function in the early secretory pathway. *Nat Cell Biol*, **14**, 764-774.
- Singer, R.H. (1993) RNA zipcodes for cytoplasmic addresses. *Curr Biol*, **3**, 719-721.
- Sonenberg, N. & Hinnebusch, A.G. (2009) Regulation of translation initiation in eukaryotes: mechanisms and biological targets. *Cell*, **136**, 731-745.
- Song, T., Zheng, Y., Wang, Y., Katz, Z., Liu, X., Chen, S., Singer, R.H. & Gu, W. (2015) Specific interaction of KIF11 with ZBP1 regulates the transport of beta-actin mRNA and cell motility. *J Cell Sci*, **128**, 1001-1010.
- Srinivasan, R., Jang, S.W., Ward, R.M., Sachdev, S., Ezashi, T. & Svaren, J. (2007) Differential regulation of NAB corepressor genes in Schwann cells. *BMC Mol Biol*, **8**, 117.
- Stevanin, G., Ruberg, M. & Brice, A. (2008) Recent advances in the genetics of spastic paraplegias. *Curr Neurol Neurosci Rep*, **8**, 198-210.
- Stokin, G.B., Lillo, C., Falzone, T.L., Brusch, R.G., Rockenstein, E., Mount, S.L., Raman, R., Davies, P., Masliah, E., Williams, D.S. & Goldstein, L.S. (2005) Axonopathy and transport deficits early in the pathogenesis of Alzheimer's disease. *Science*, **307**, 1282-1288.
- Sugiyama, S., Di Nardo, A.A., Aizawa, S., Matsuo, I., Volovitch, M., Prochiantz, A. & Hensch, T.K. (2008) Experience-dependent transfer of Otx2 homeoprotein into the visual cortex activates postnatal plasticity. *Cell*, **134**, 508-520.
- Sutton, M.A. & Schuman, E.M. (2006) Dendritic protein synthesis, synaptic plasticity, and memory. *Cell*, **127**, 49-58.
- Theisen, U., Straube, E. & Straube, A. (2012) Directional persistence of migrating cells requires Kif1C-mediated stabilization of trailing adhesions. *Dev Cell*, **23**, 1153-1166.
- Thornburg-Suresh, E.J.C., Richardson, J.E. & Summers, D.W. (2023) The Stathmin-2 membrane-targeting domain is required for axon protection and regulated degradation by DLK signaling. *J Biol Chem*, **299**, 104861.
- Tom Dieck, S., Hanus, C. & Schuman, E.M. (2014) SnapShot: local protein translation in dendrites. *Neuron*, **81**, 958-958 e951.
- Torero Ibad, R., Rheey, J., Mrejen, S., Forster, V., Picaud, S., Prochiantz, A. & Moya, K.L. (2011) Otx2 promotes the survival of damaged adult retinal ganglion cells and protects against excitotoxic loss of visual acuity in vivo. *J Neurosci*, **31**, 5495-5503.
- Trinh, M.A., Kaphzan, H., Wek, R.C., Pierre, P., Cavener, D.R. & Klann, E. (2012) Brain-specific disruption of the eIF2alpha kinase PERK decreases ATF4 expression and impairs behavioral flexibility. *Cell Rep*, **1**, 676-688.

- Vasudevan, D., Neuman, S.D., Yang, A., Lough, L., Brown, B., Bashirullah, A., Cardozo, T. & Ryoo, H.D. (2020) Translational induction of ATF4 during integrated stress response requires noncanonical initiation factors eIF2D and DENR. *Nat Commun*, **11**, 4677.
- Wang, D.O., Martin, K.C. & Zukin, R.S. (2010) Spatially restricting gene expression by local translation at synapses. *Trends Neurosci*, **33**, 173-182.
- Wang, T., Hamilla, S., Cam, M., Aranda-Espinoza, H. & Mili, S. (2017) Extracellular matrix stiffness and cell contractility control RNA localization to promote cell migration. *Nat Commun*, **8**, 896.
- Weedon, M.N., Hastings, R., Caswell, R., Xie, W., Paszkiewicz, K., Antoniadis, T., Williams, M., King, C., Greenhalgh, L., Newbury-Ecob, R. & Ellard, S. (2011) Exome sequencing identifies a DYNC1H1 mutation in a large pedigree with dominant axonal Charcot-Marie-Tooth disease. *Am J Hum Genet*, **89**, 308-312.
- Wei, M., Huang, J., Li, G.W., Jiang, B., Cheng, H., Liu, X., Jiang, X., Zhang, X., Yang, L., Bao, L. & Wang, B. (2021) Axon-enriched lincRNA ALAE is required for axon elongation via regulation of local mRNA translation. *Cell Rep*, **35**, 109053.
- Wizenmann, A., Brunet, I., Lam, J., Sonnier, L., Beurdeley, M., Zarbalis, K., Weisenhorn-Vogt, D., Weinl, C., Dwivedy, A., Joliot, A., Wurst, W., Holt, C. & Prochiantz, A. (2009) Extracellular Engrailed participates in the topographic guidance of retinal axons in vivo. *Neuron*, **64**, 355-366.
- Yim, Y.S., Kwon, Y., Nam, J., Yoon, H.I., Lee, K., Kim, D.G., Kim, E., Kim, C.H. & Ko, J. (2013) Slitrks control excitatory and inhibitory synapse formation with LAR receptor protein tyrosine phosphatases. *Proc Natl Acad Sci U S A*, **110**, 4057-4062.
- Zivraj, K.H., Tung, Y.C., Piper, M., Gumy, L., Fawcett, J.W., Yeo, G.S. & Holt, C.E. (2010) Subcellular profiling reveals distinct and developmentally regulated repertoire of growth cone mRNAs. *J Neurosci*, **30**, 15464-15478.

### **Author's contribution**

Author contribution R.S., S.H., L.S., M.Na., J.X., and M.H. designed the research; S.H., M.K., and N.C. established the axon separation and axon seq technique. J.X., M.H., M.Na., M.K., and M.No. performed the research; R.S., J.X., M.Na. and M.H. analyzed the data; J.A and N.C. performed the RNA-seq library construction. R.S., M.H., and J.X. wrote the paper with input from all authors.

### **Acknowledgment and Funding**

This work was funded by the Bundesministerium für Bildung und Forschung (BMBF) through funding for the TreatHSP network (grant 01GM1905A and 01GM2209A to RS, grant 01GM2209F to LS and SH), the National Institute of Neurological Disorders and Stroke (NINDS) / National Institutes of Health (NIH) under Award Number R01NS072248 (grant to RS), and the Clinician Scientist Programme PRECISE.net funded by the Else Kröner-Fresenius-Stiftung (grant to RS). RS and LS are members of the European Reference Network for Rare Neurological Diseases – Project ID 739510. NGS sequencing methods were performed with the support of the DFG-funded NGS Competence Center Tübingen (INST 37/1049-1).

We would like to thank Jessica Cielenga for her technical support.
